# Supplementary material for: Poly(3-hydroxybutyrate)/poly(amine)-coated nickel oxide nanoparticles for norfloxacin delivery: antibacterial and cytotoxicity efficiency
Source: Royal Society of Chemistry journal article supplement (doi:10.1039/d0ra04784h), 2020-01-01
Supplement: d0ra04784h1.pdf [file d0ra04784h1.pdf]

**Poly(3-hydroxybutyrate)/poly(amine)-coated NiO nanoparticles for NOR delivery:  
Antibacterial and cytotoxicity efficiency.**

Nehal Salahuddin<sup>1\*</sup>, Mohamed Gaber<sup>1</sup>, Maie Mousa<sup>1</sup>, Mohamed Abdelwahab<sup>1,‡\*</sup>

<sup>1</sup>Chemistry Department, Faculty of Science, Tanta University, Tanta, 31527 Egypt

\*Correspondence to Nehal Salahuddin (E-mail: [nehal.ataf@science.tanta.edu.eg](mailto:nehal.ataf@science.tanta.edu.eg)); Mohamed Abdelwahab (E-mail: [mohamed.abdelwahab@science.tanta.edu.eg](mailto:mohamed.abdelwahab@science.tanta.edu.eg))

**Supporting Information**

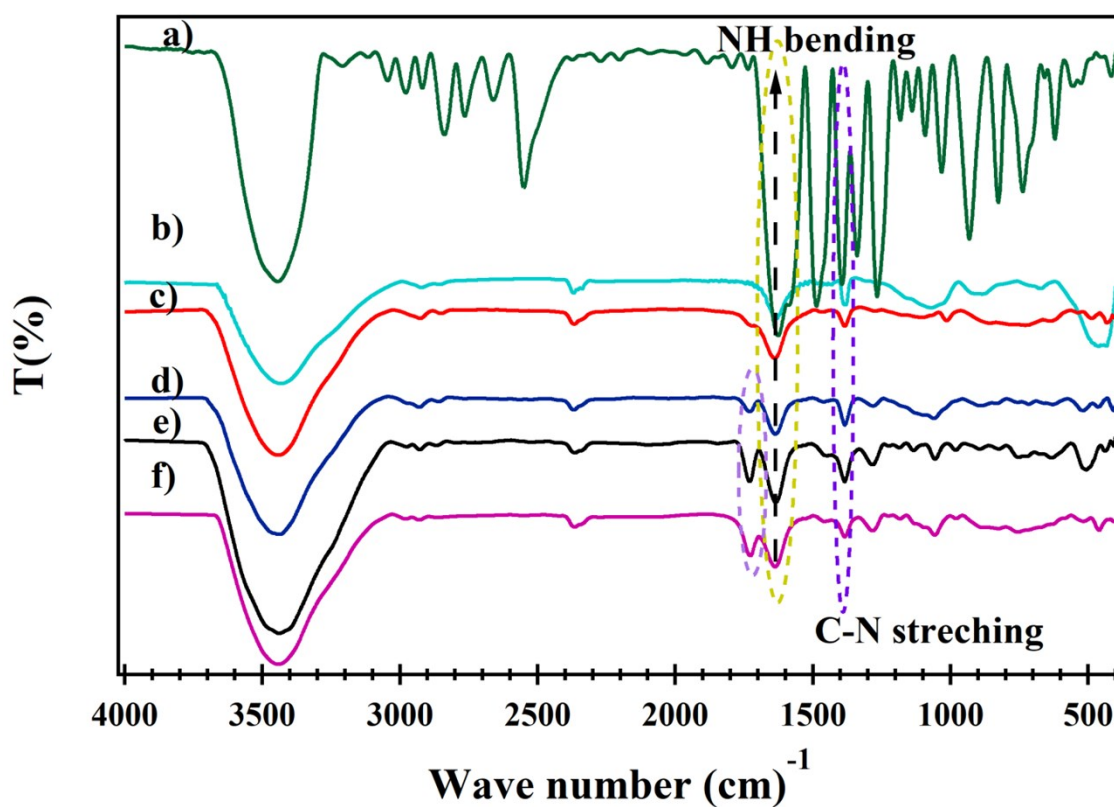

Fig. S1: FTIR spectra of a) Norfloxacin, b) NF@NiO, c) NF@PHB, d) NF@PHB/polyamine, e) NF@PHB/polyamine-3%NiO and f) NF@PHB/polyamine-5%NiO
